# Supplementary material for: Effect of ring fusion on the amplified spontaneous emission properties of oligothiophenes
Source: Royal Society of Chemistry journal article supplement (doi:10.1039/b907106g), 2009-01-01
Supplement: b907106g.pdf [file b907106g.pdf]

## Supplementary data

### Effect of ring fusion on the amplified spontaneous emission properties of oligothiophenes

Victor Navarro-Fuster,<sup>†</sup> Eva M. Calzado,<sup>†</sup> Manuel G. Ramirez,<sup>†</sup> Pedro G. Boj,<sup>†</sup> John T. Henssler,<sup>#</sup>  
Adam J. Matzger,<sup>#</sup> Víctor Hernández,<sup>§</sup> Juan T. López Navarrete<sup>§</sup> and María A. Díaz-García<sup>\*†</sup>

<sup>†</sup> *Instituto Universitario de Materiales de Alicante and Unidad Asociada UA-CSIC, Universidad de Alicante, 03080-Alicante, Spain.* <sup>#</sup> *Macromolecular Science and Engineering Program, University of Michigan, 930 North University, Ann Arbor, Michigan 48109-1055 (USA).* <sup>§</sup> *Departament of Physical Chemistry, University of Málaga 29071-Málaga (Spain)*

\* Corresponding author. Phone: +34 965903543; Fax: +34 965909726; E-mail: maria.diaz@ua.es

**Table S1:** B3LYP/6-31G\*\* Values (in Å) for Selected Skeletal Bond Lengths of BT-PTA and their counterparts in BT- $\alpha$ 3T.

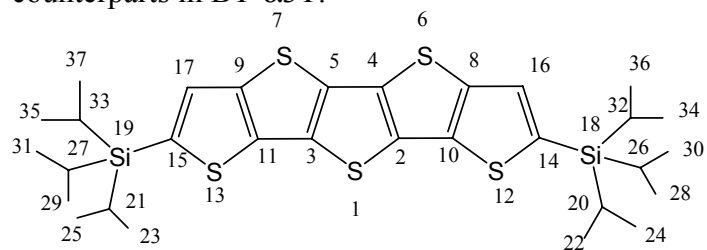

| Bond                              | BT-PTA | BT- $\alpha$ 3T |
|-----------------------------------|--------|-----------------|
| S <sub>1</sub> -C <sub>2</sub>    | 1.756  | 1.757           |
| C <sub>2</sub> -C <sub>4</sub>    | 1.395  | 1.380           |
| C <sub>4</sub> -C <sub>5</sub>    | 1.419  | 1.415           |
| C <sub>4</sub> -S <sub>6</sub>    | 1.756  |                 |
| S <sub>6</sub> -C <sub>8</sub>    | 1.762  |                 |
| C <sub>8</sub> -C <sub>10</sub>   | 1.394  | 1.379           |
| C <sub>10</sub> -C <sub>2</sub>   | 1.419  | 1.446           |
| C <sub>10</sub> -S <sub>12</sub>  | 1.737  | 1.754           |
| S <sub>12</sub> -C <sub>14</sub>  | 1.772  | 1.755           |
| C <sub>14</sub> -C <sub>16</sub>  | 1.380  | 1.380           |
| C <sub>16</sub> -C <sub>8</sub>   | 1.420  | 1.420           |
| C <sub>14</sub> -Si <sub>18</sub> | 1.896  | 1.897           |
| Si <sub>18</sub> -C <sub>20</sub> | 1.921  | 1.925           |
| C <sub>20</sub> -C <sub>22</sub>  | 1.541  | 1.541           |
| C <sub>22</sub> -C <sub>24</sub>  | 1.540  | 1.540           |
| Si <sub>18</sub> -C <sub>26</sub> | 1.919  | 1.922           |
| C <sub>26</sub> -C <sub>28</sub>  | 1.542  | 1.542           |
| C <sub>26</sub> -C <sub>30</sub>  | 1.541  | 1.541           |
| Si <sub>18</sub> -C <sub>32</sub> | 1.921  | 1.925           |
| C <sub>32</sub> -C <sub>34</sub>  | 1.542  | 1.542           |
| C <sub>32</sub> -C <sub>36</sub>  | 1.541  | 1.541           |
